# Supplementary material for: Untargeted Metabolomics and Gut Microbiota Modulation Study of Fermented Brown Rice for Obesity
Source: PubMed Central journal article supplement — ACS Omega. 2024 Aug 28;9(36):37636–49. doi: 10.1021/acsomega.4c01203 (PMC11391566; doi:10.1021/acsomega.4c01203), 2024-08-28
Supplement: ao4c01203_si_001.pdf [file ao4c01203_si_001.pdf]

## Supporting Information

### Untargeted Metabolomics and Gut Microbiota Modulation Study of Fermented Brown Rice for Obesity

Kaliyan Barathikannan <sup>1,5</sup>, Ramachandran Chelliah <sup>1,3</sup>, Selvakumar Vijayalakshmi <sup>1</sup>, Fred Kwame Ofosu <sup>1</sup>, Su-Jung Yeon <sup>1,2</sup>, Deuk-Sik Lee <sup>2</sup>, Jong-Soon Park <sup>2</sup>, Nam-Hyeon Kim <sup>1</sup>, and Deog-Hwan Oh <sup>1,3,4\*</sup>

<sup>1</sup> Department of Food Science and Biotechnology, College of Agriculture and Life Sciences, Kangwon National University, Chuncheon 24341, Republic of Korea.

<sup>2</sup> Life Science Institute, Well-being LS Co., Ltd., Gangneung 25451, Republic of Korea.

<sup>3</sup> Future F Biotech Co., Ltd., Chuncheon 24341, South Korea.

<sup>4</sup> Kangwon Institute of Inclusive Technology KIIT, Kangwon National University, Chuncheon 24341, Republic of Korea.

<sup>5</sup> Saveetha School of Engineering, Saveetha (SIMATS) University, Chennai, Tamil Nadu 600124, India.

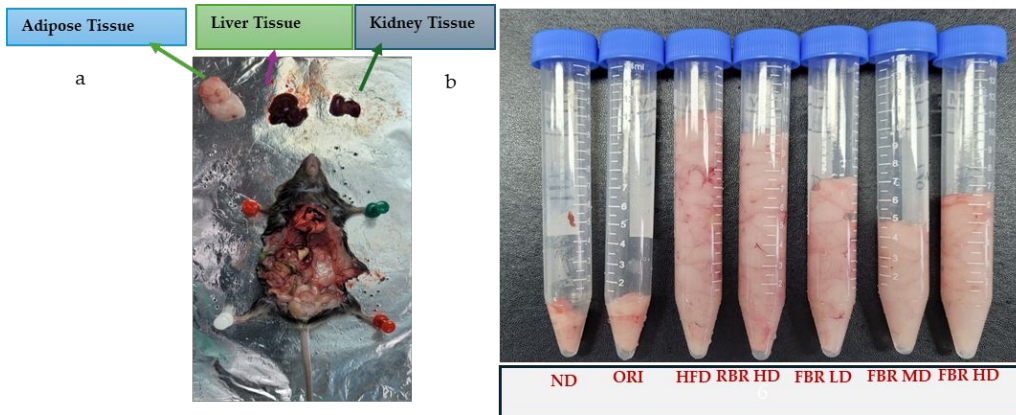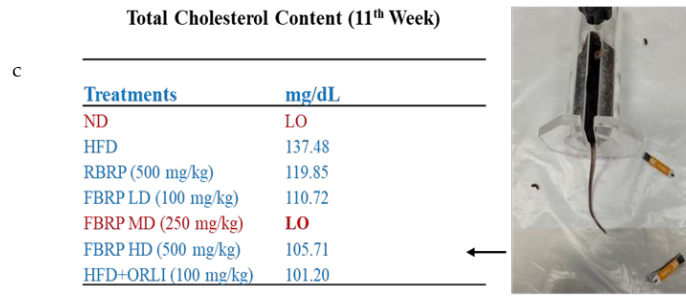

Figure S1. Dissection procedure on 11th week FBR treatments: (a) general view of the adipose, liver, and kidney, (b) collection of Adipose (n=7), (c) Total Cholesterol Checked by Bene Check Monitoring System.

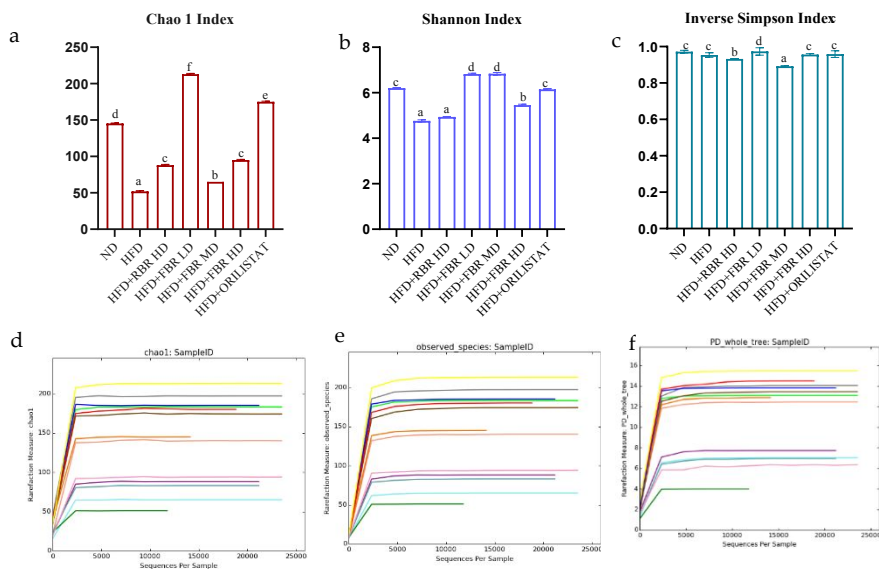

Figure S2. FBR improves HFD-induced obesity in mice gut microbiota. (a) Chao Index, (b) Shannon Index, (c) Inverse Simpson Index, (d, e, f) Alpha rarefaction plots of identified species/OTU.

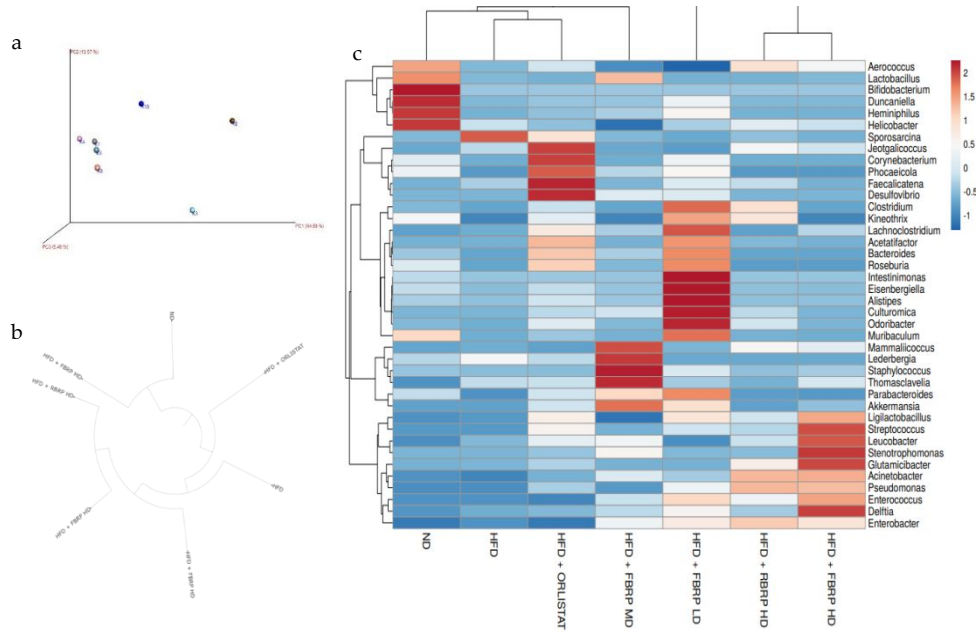

Figure S3. FBR improves HFD-induced obesity in mice gut microbiota. (a) Weighted Unifrac PCoA Plot, (b) Phylogenetic tree, (c) Heatmap of gut microbiota composition in different groups a genus level.
